# Supplementary material for: Betulinic acid acetate, an antiproliferative natural product, suppresses client proteins of heat shock protein pathways through a CDC37-binding mechanism
Source: Royal Society of Chemistry journal article supplement (doi:10.1039/c6ra04776a), 2016-01-01
Supplement: c6ra04776a1.pdf [file c6ra04776a1.pdf]

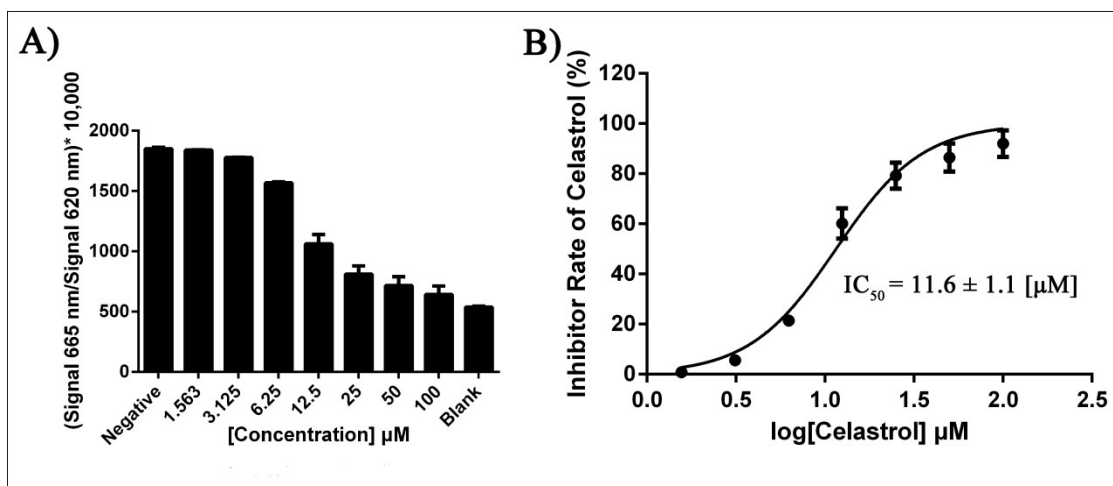

Figure S-1. Celastrol inhibit Hsp90-Cdc37 formation by HTRF. A) The raw data of HTRF signal B) The  $\text{IC}_{50}$  of celastrol

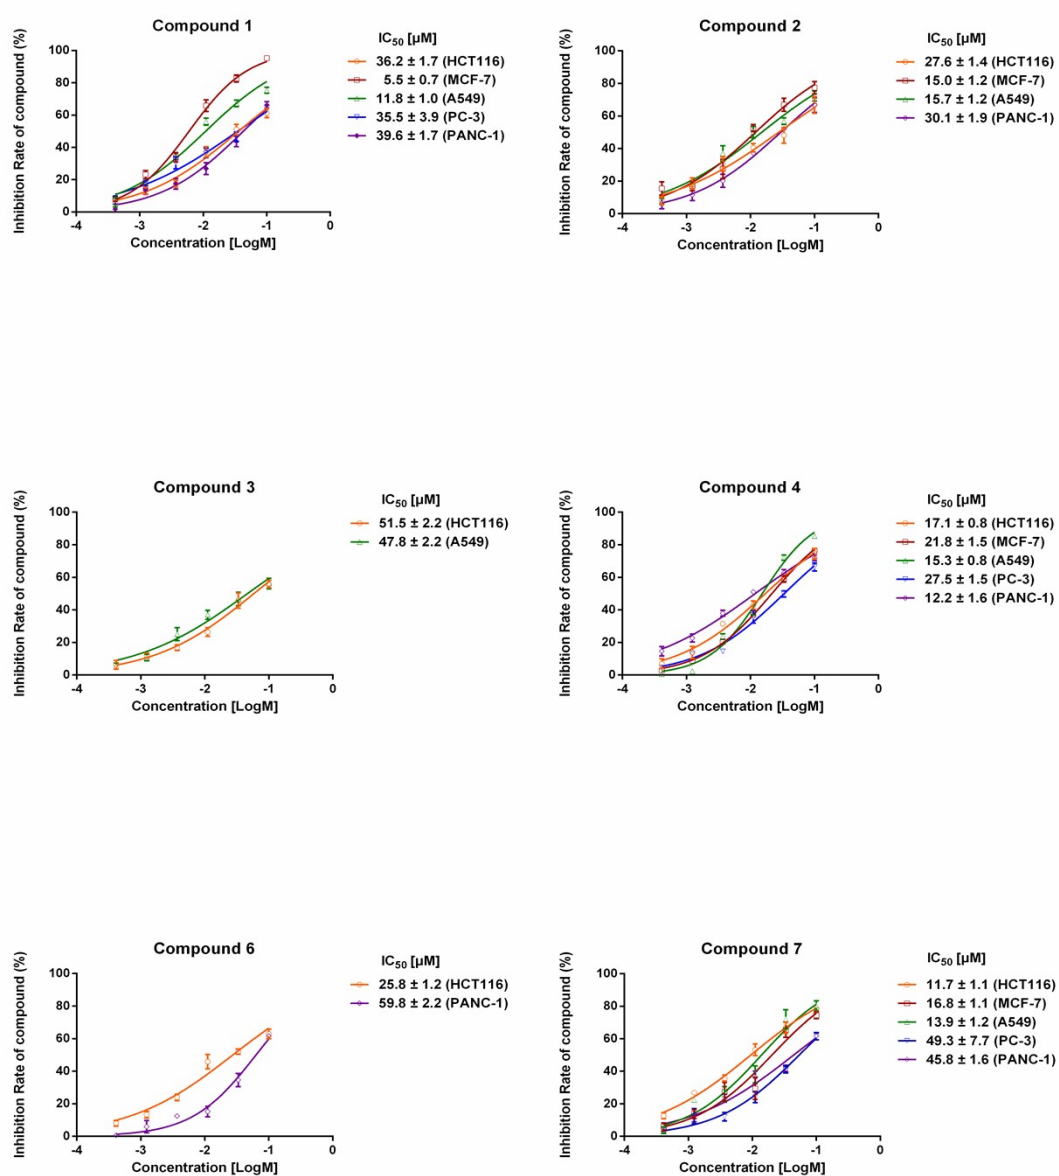

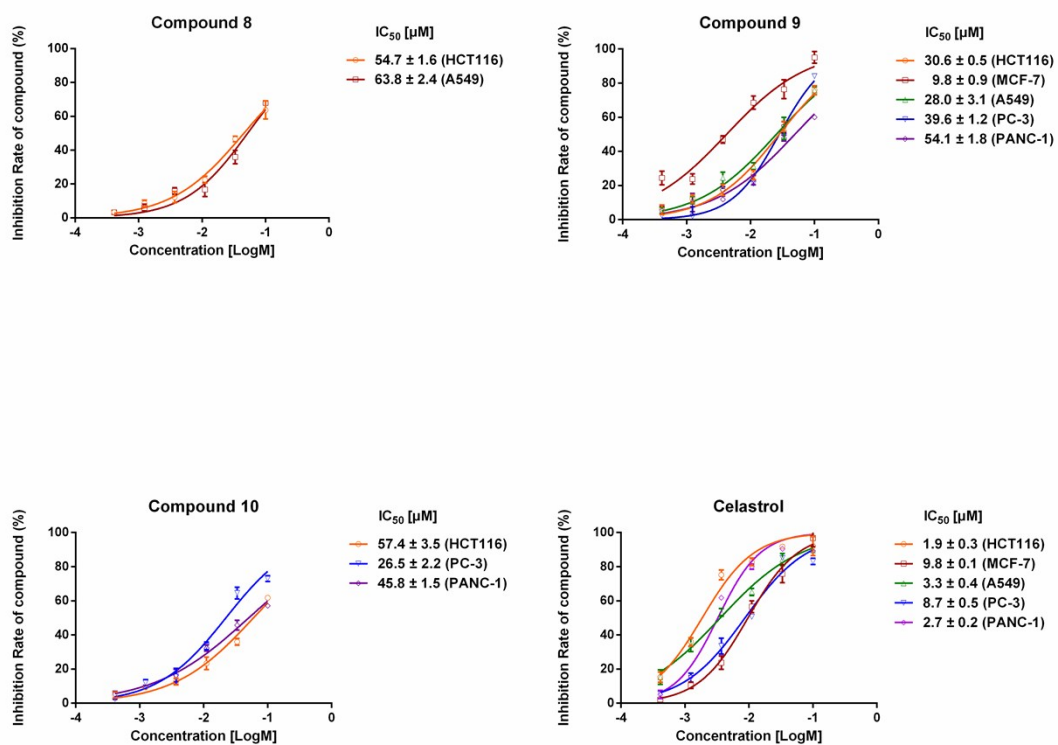

Figure S-2 and Figures S-3. The IC<sub>50</sub> curves that produced the values in Table 2.
